# Supplementary material
Source: PubMed Central journal article supplement (PMC4849825)
Supplement: ASN.2015030312_ASN2015030312SupplementaryData.pdf [file ASN.2015030312_ASN2015030312SupplementaryData.pdf]

|                                        | <b>N</b>     | <b>Mean</b> | <b>Standard deviation</b> |
|----------------------------------------|--------------|-------------|---------------------------|
| Age                                    | 7            | 60          | 17                        |
| Kt/Vurea                               | 7            | 1.48        | 0.34                      |
| White blood cells (thousands/ $\mu$ L) | 7            | 7.9         | 3.8                       |
| Hemoglobin (g/dl)                      | 7            | 9.8         | 1.6                       |
| 25 OH vitamin D (ng/mL)                | 7            | 8.0         | 5.2                       |
| Total proteins (g/dl)                  | 7            | 6.3         | 0.4                       |
| Albumin (g/dl)                         | 7            | 3.4         | 0.35                      |
| Calcium (mg/dl)                        | 7            | 8.4         | 1.0                       |
| Phosphate (mg/dl)                      | 7            | 4.6         | 1.1                       |
| Cholesterol (mg/dl)                    | 7            | 143         | 23                        |
| Triglycerides (mg/dl)                  | 7            | 124         | 56                        |
| C reactive protein (mg/dl)             | 7            | 14.5        | 18.9                      |
| Parathormone (pg/ml)*                  | 7            | 378         | 257-712                   |
| EPO dose (U/week)                      | 7/7 (100%)   | 8831        | 3371                      |
| Calcium-based P binders (mg/day)       | 3/7 (42.85%) | 3666        | 2081                      |
| Sevelamer (mg/day)                     | 2/7 (28.57%) | 3600        | 1697                      |
| Lanthanum (mg/day)                     | 0/7 (0%)     | -           | -                         |
| Magnesium-based P binders (mg/day)     | 0/7 (0%)     | -           | -                         |

**Supplementary table 1. Baseline clinical and biochemical characteristics. Pilot incident patient study.**

P: phosphate

\* Median and interquartile range shown

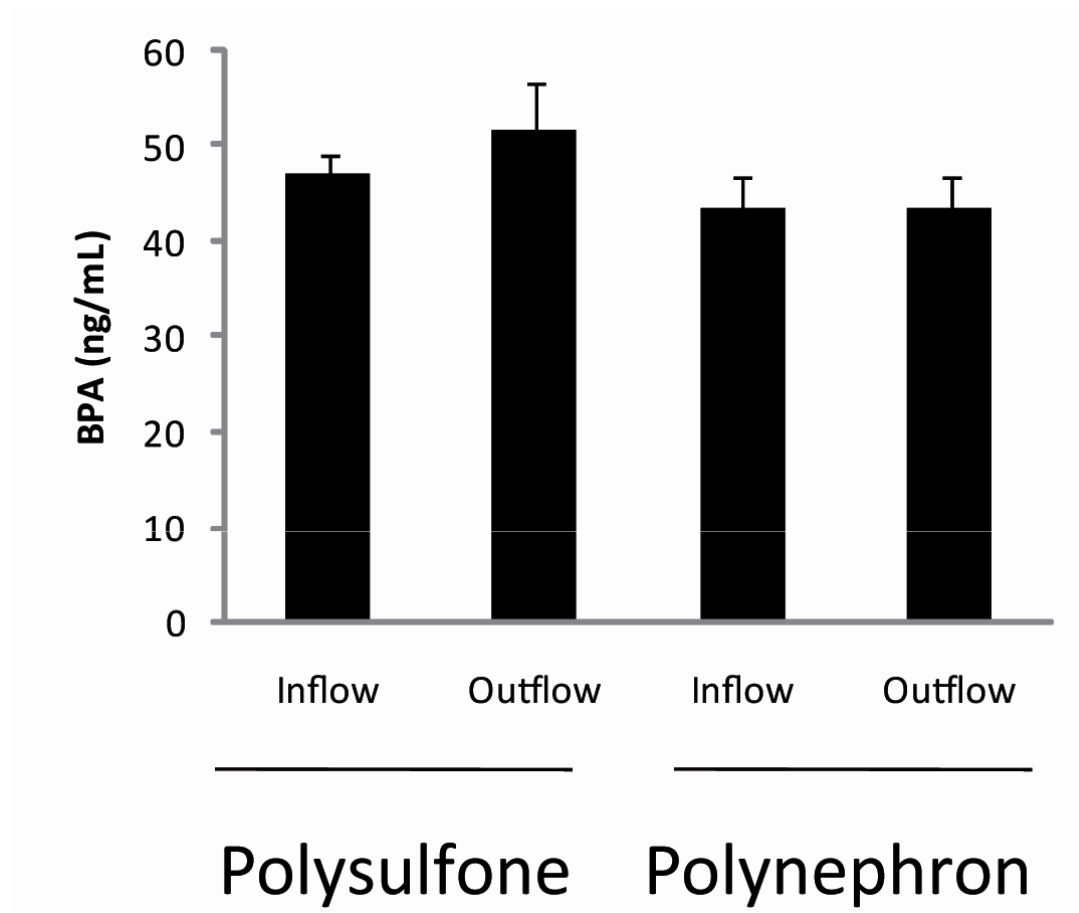

**Supplementary figure 1. Inflow and outflow serum BPA concentrations.** Inflow and outflow serum BPA was assessed in 5 patients.

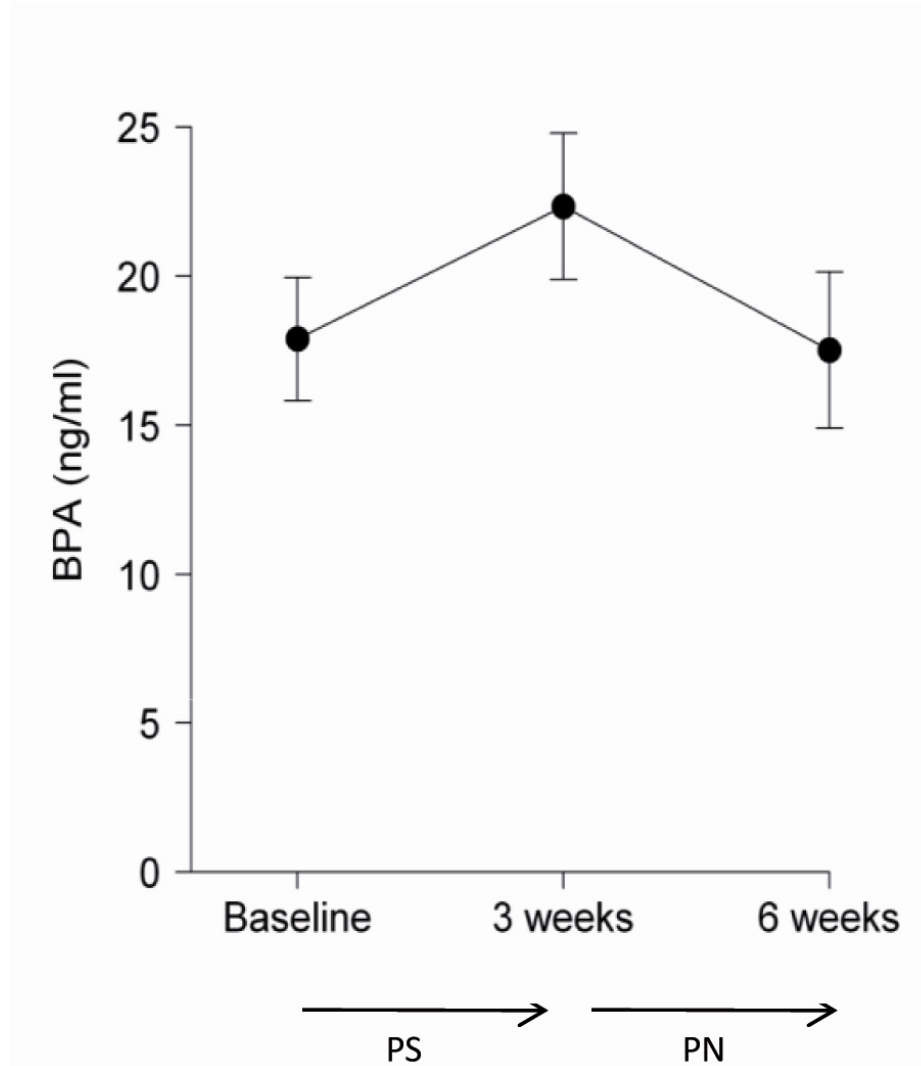

**Supplementary figure 2. Serum BPA concentrations in incident hemodialysis patients.** Incident hemodialysis patients (n=7) were evaluated at baseline and following three weeks of dialysis with polysulfone and next polynephron membranes.

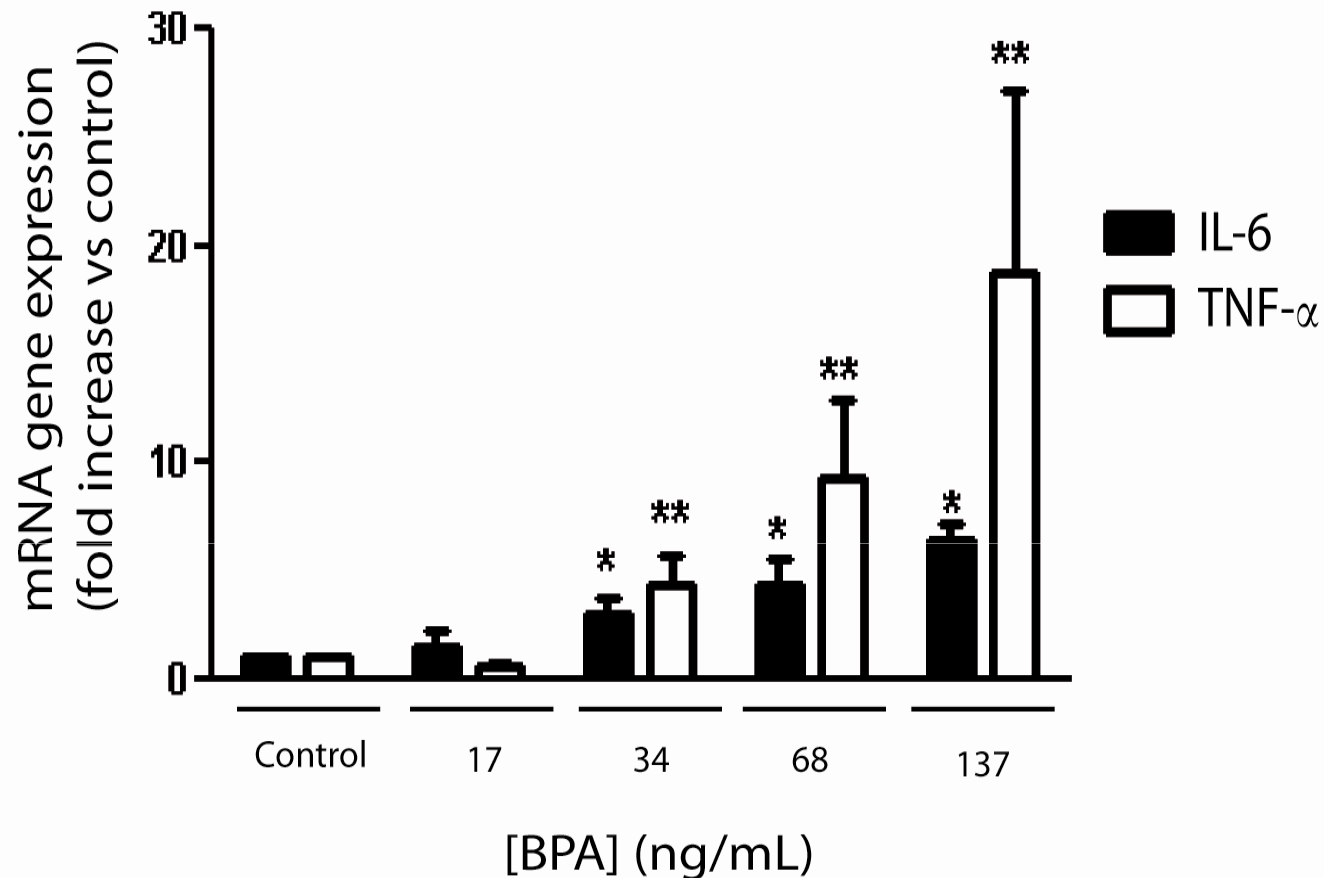

**Supplementary figure 3. BPA is proinflammatory.** PBMC were cultured for 24 hours in the presence of different concentrations of BPA. BPA dose-dependently increases the mRNA expression for the inflammatory cytokines TNF and IL-6. qRT-PCR.

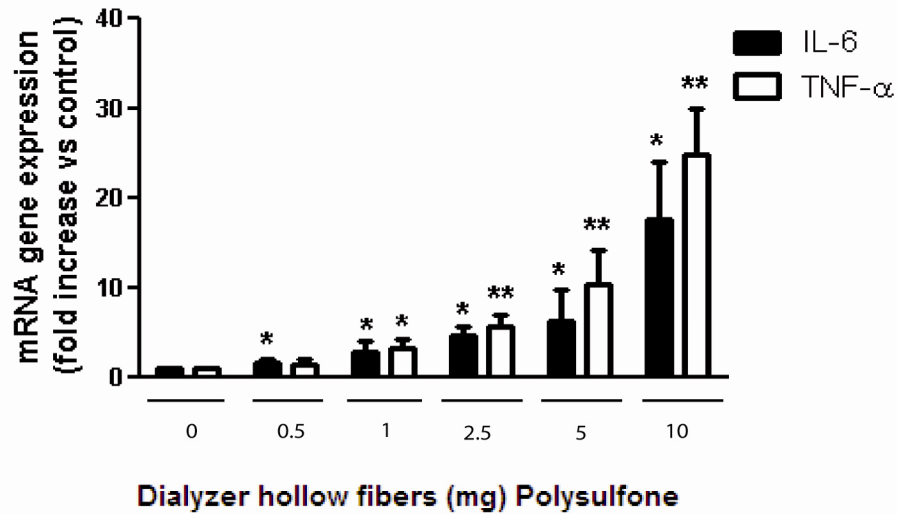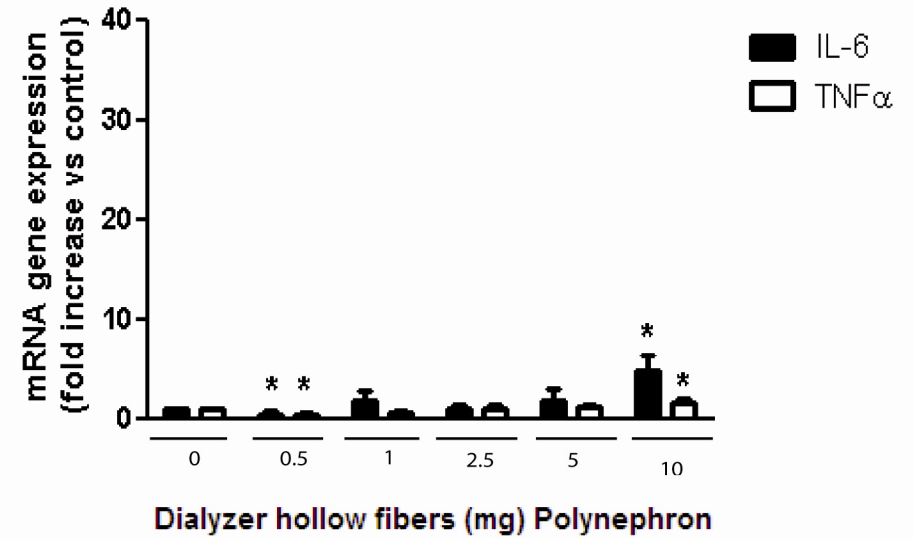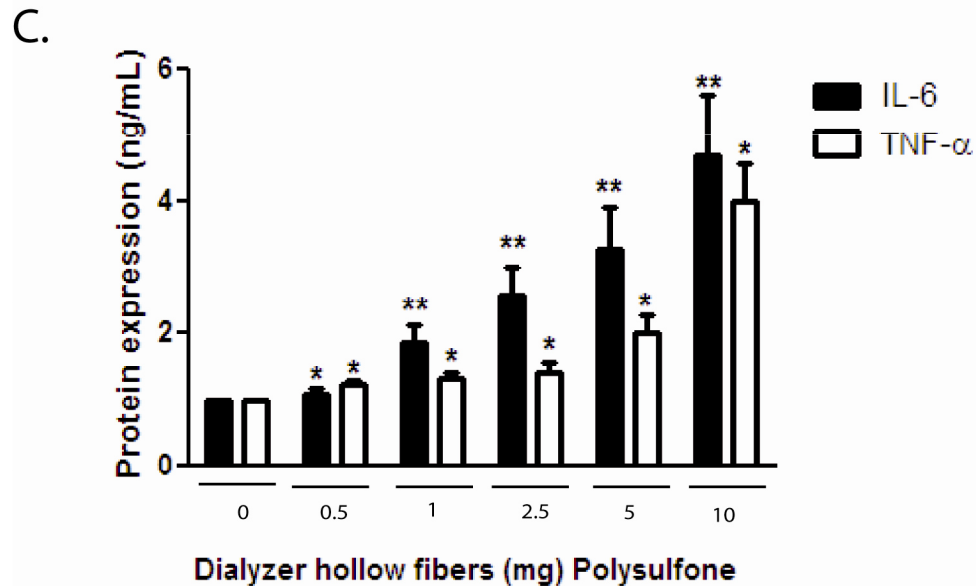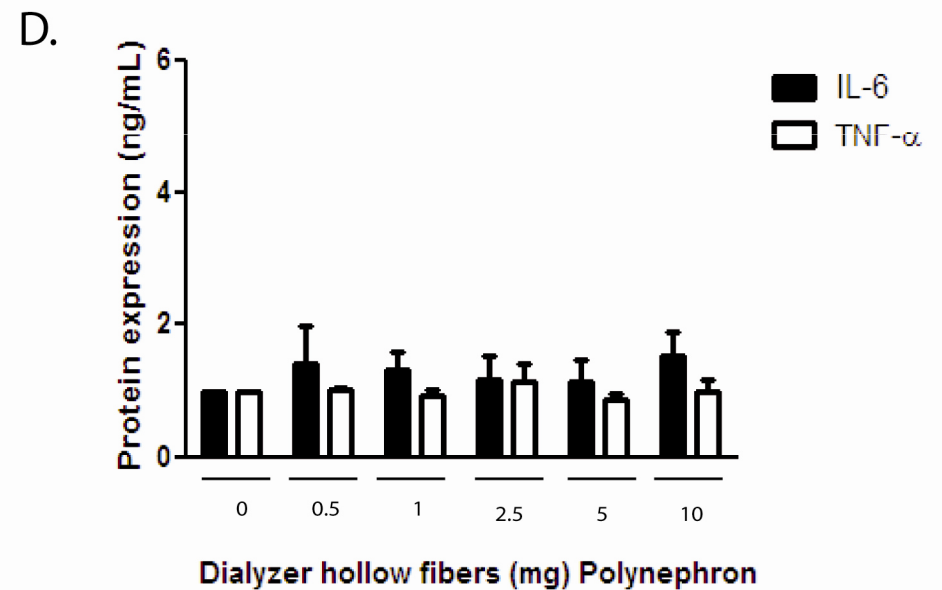

**Supplementary figure 4. BPA-containing dialyzer fibers (polysulfone) are proinflammatory.** PBMC were cultured for 24 hours in the presence of different concentrations of mashed dialyzer fibers. **A)** BPA-containing dialyzer fibers (polysulfone) dose-dependently increase cytokine mRNA expression. qRT-PCR. **B)** BPA-free dialyzer fibers (polynephron) effect on cytokine mRNA expression. **C)** BPA-containing dialyzer fibers (polysulfone) dose-dependently increase supernatant cytokine levels. ELISA. **D)** BPA-free dialyzer fibers (polynephron) effect on supernatant cytokine levels. Mean $\pm$ SEM of 7 independent experiments. \*  $p < 0.05$  vs control; \*\*  $p < 0.001$  vs control.

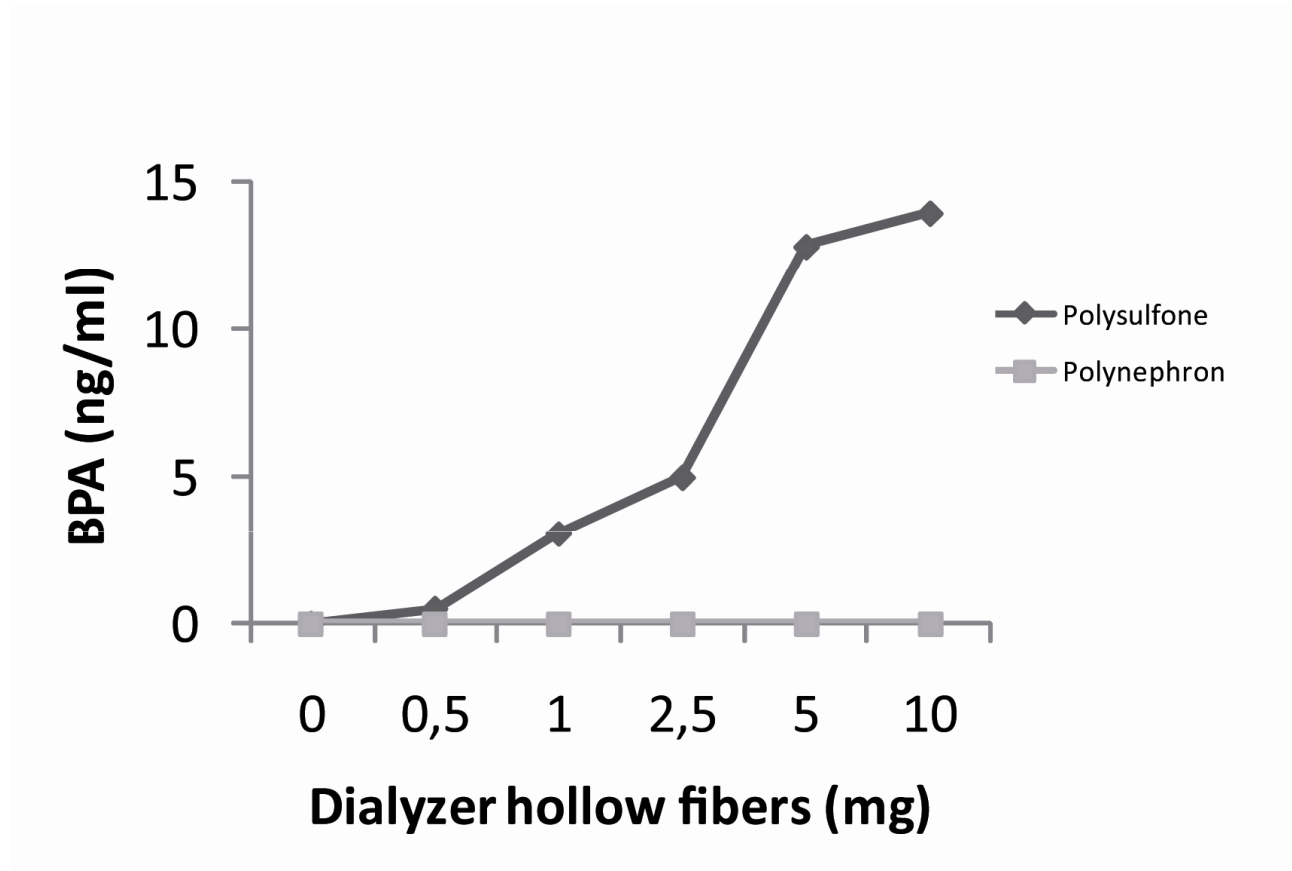

**Supplementary figure 5.** BPA is released to the supernatants from dialyzer fibers (polysulfone or polynephron) in culture for 24 hours (mean of 2 experiments).
